# Supplementary material for: Tunable optoelectronic response multifunctional materials: exploring switching and photoluminescence integrated in flexible thin films/crystals
Source: Royal Society of Chemistry journal article supplement (doi:10.1039/d0tc00266f), 2020-01-01
Supplement: d0tc00266f1.pdf [file d0tc00266f1.pdf]

## Supporting information

### **Tunable optoelectronic response multifunctional material: exploring switches and photoluminescence integrated in flexible thin film/crystal**

Ya-Yuan Luo,<sup>a</sup> Zhi-Xu Zhang,<sup>a</sup> Chang-Yuan Su,<sup>a</sup> Wan-Ying Zhang,<sup>b</sup> Ping-Ping Shi,<sup>a</sup> Qiong Ye\*<sup>a</sup> and Da-Wei Fu\*<sup>ab</sup>

<sup>a</sup>*Ordered Matter Science Research Center, Jiangsu Key Laboratory for Science and Applications of Molecular Ferroelectrics, Southeast University, Nanjing 211189, P.R. China. E-mail: [dawei@seu.edu.cn](mailto:dawei@seu.edu.cn).*

<sup>b</sup>*Institute for Science and Applications of Molecular Ferroelectrics, Department of Chemistry, Zhejiang Normal University, 688 Yingbin Road, Jinhua 321004, P.R. China)*

#### **Experimental Measurement Methods**

##### **Single crystal X-ray crystallography**

Variable-temperature X-ray single-crystal diffraction data of (IPTMA)<sub>2</sub>CdBr<sub>4</sub> and (IPTMA)<sub>2</sub>MnBr<sub>4</sub> are collected using Mo K $\alpha$  radiation ( $\lambda = 0.71073 \text{ \AA}$ ) on a Rigaku Saturn 724 diffractometer at  $\omega$  scan mode. Data processing, including empirical absorption correction, was performed by using the Crystal Clear software package. Crystal structure at HTP, LTP for compound (IPTMA)<sub>2</sub>CdBr<sub>4</sub> and at HTP, ITP, LTP for (IPTMA)<sub>2</sub>MnBr<sub>4</sub> were resolved by direct method and continuous Fourier synthesis, and then refined by full-matrix least-squares methods based on  $F^2$  with the SHELXLTL software package. All non-hydrogen atoms were refined anisotropically using all reflections with  $I > 2\sigma(I)$ , and the hydrogen atoms were generated geometrically at appropriate position. Moreover, calculations involving the angles and distances between some atoms were measured by DIAMOND and SHELXLTL. Crystallographic data and structure refinement of (IPTMA)<sub>2</sub>CdBr<sub>4</sub> and (IPTMA)<sub>2</sub>MnBr<sub>4</sub> at various temperatures is listed in Table S1 and Table S2 respectively.

##### **Powder X-ray diffraction**

Variable-temperature powder X-ray diffraction (PXRD) measurements were performed

on a Rigaku D/MAX 2000 PC X-ray diffractometer. The PXRD patterns of  $(\text{IPTMA})_2\text{CdBr}_4$  and  $(\text{IPTMA})_2\text{MnBr}_4$  were collected in the  $2\theta$  range of  $5^\circ$ – $50^\circ$  with a step size of  $0.02^\circ$ .

#### **Thermal analysis measurements**

Differential scanning calorimetry (DSC) measurements were performed on a NETZSCH DSC 214 instrument. The crystalline samples of the two compounds were measured with a rate of  $10\text{ K min}^{-1}$  under a nitrogen atmosphere in aluminum crucibles in the temperature range from 270 K to 135 K.

#### **Dielectric properties measurements**

The complex dielectric permittivity curves were measured on an automatic impedance Tonghui 2828 analyzer from 300 K to 100 K in the frequency range from 10 kHz to 1 MHz with an applied voltage of 1.0 V. Dielectric studies were performed on pressed-powder pellets and single crystal samples, and conductive carbon/silver glue was deposited on the surface of electrode to simulate parallel plate capacitors.

#### **Photoluminescence spectroscopic measurements**

The excitation and emission spectra of  $(\text{IPTMA})_2\text{MnBr}_4$  in the solid states were measured on an Edinburgh FLS-920 fluorescence spectrometer. For photoluminescence quantum yield (PLQY) measurements, the absolute quantum efficiencies were acquired by using an integrating sphere incorporated into the Edinburgh FLS-920 fluorescence spectrometer.

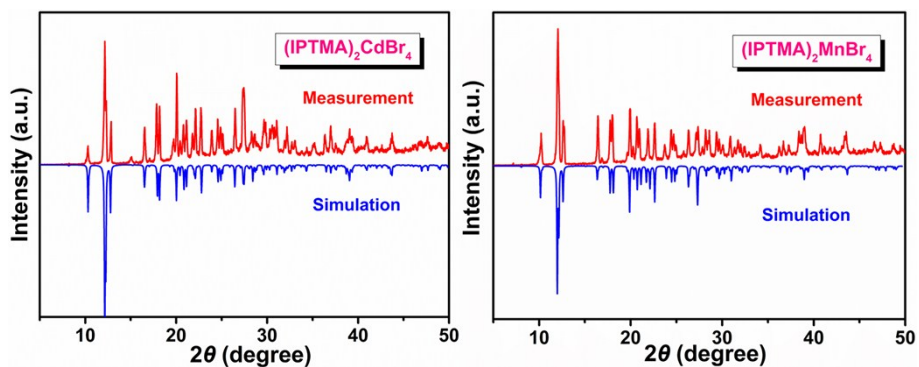

**Fig. S1** Comparison between measurement and simulation PXRD of  $(\text{IPTMA})_2\text{CdBr}_4$  (left) and  $(\text{IPTMA})_2\text{MnBr}_4$  (right).

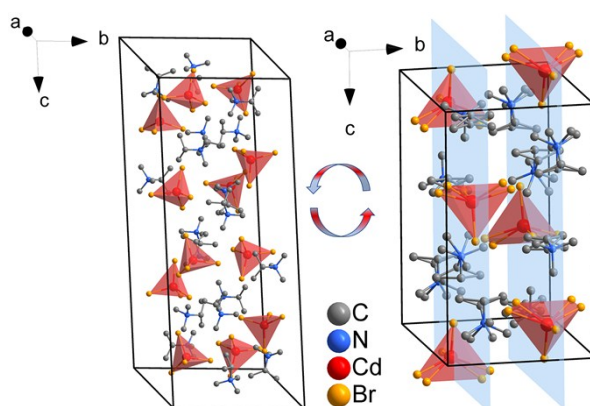

**Fig. S2** Structural packing diagrams of  $(\text{IPTMA})_2\text{CdBr}_4$  at LTP (left) and HTP (right), indicating similarity of lattice framework and differences in motion state of cations and anions. All hydrogen atoms are omitted for clarity.

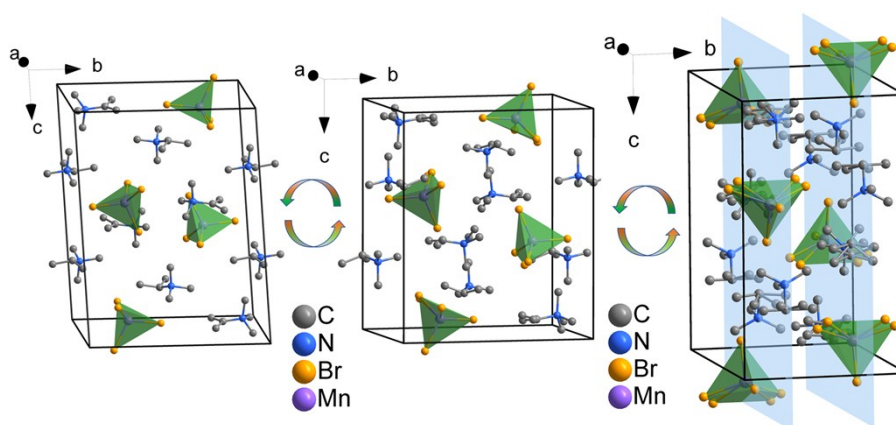

**Fig. S3** Structural packing diagrams of  $(\text{IPTMA})_2\text{MnBr}_4$  at LTP (left), ITP (middle) and HTP (right), manifesting similarity of lattice framework and differences in motion state of cations and anions. All hydrogen atoms are omitted for clarity.

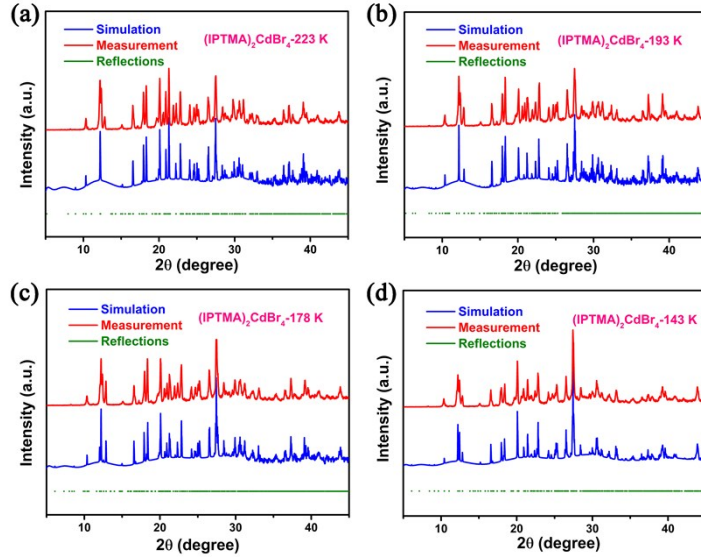

**Fig. S4** Pawley refinement of PXRD data of  $(\text{IPTMA})_2\text{CdBr}_4$  at (a) 223 K, (b) 193 K, (c) 178 K and (d) 143 K. The simulated plots match well with the measured ones. As a result of the plot fitting, the structures at 223 K and 193 K and 178 K should belong to orthorhombic system. The structural refinements reveal a point group  $mmm$  with the most possible space group  $Pnma$ . At 143 K, the refinements reveal a point group  $2/m$  with the most possible space group  $P2_1/c$ .

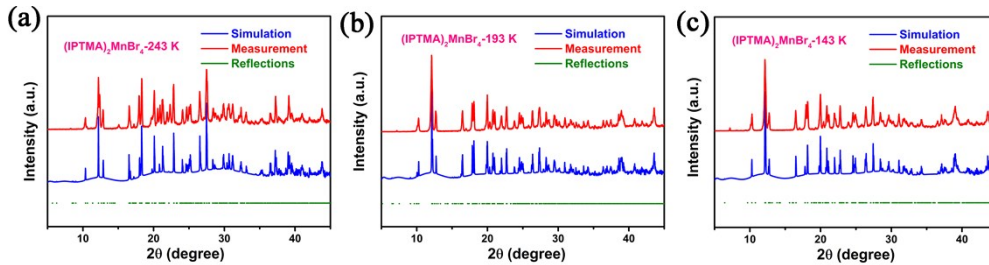

**Fig. S5** Pawley refinement of PXRD data of  $(\text{IPTMA})_2\text{MnBr}_4$  at (a) 243 K, (b) 193 K and (c) 143 K. The simulated plots match well with the measured ones. The structural refinements at 243 K reveal a point group  $mmm$  with the most possible space group  $Pnma$ . At 193 K and 143 K, the refinements reveal a point group  $2/m$  with the most possible space group  $P2_1/c$ .

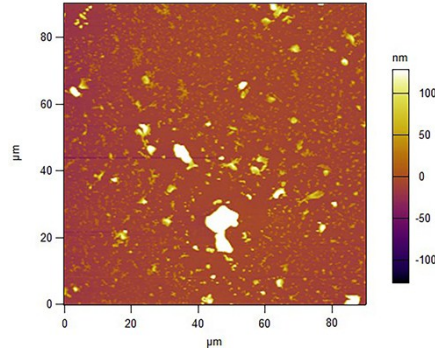

**Fig. S6** The surface topography of  $(\text{IPTMA})_2\text{MnBr}_4$  thin film under a polarizing microscope.

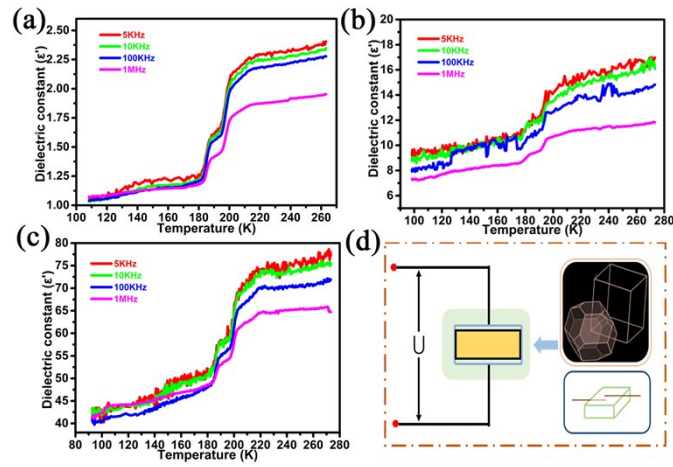

**Fig. S7** The real part of the dielectric of  $(\text{IPTMA})_2\text{CdBr}_4$  measured along (a) the a-axis, (b) the b-axis, (c) the c-axis and (d) the mechanism schematic illustration of the permittivity measurement.

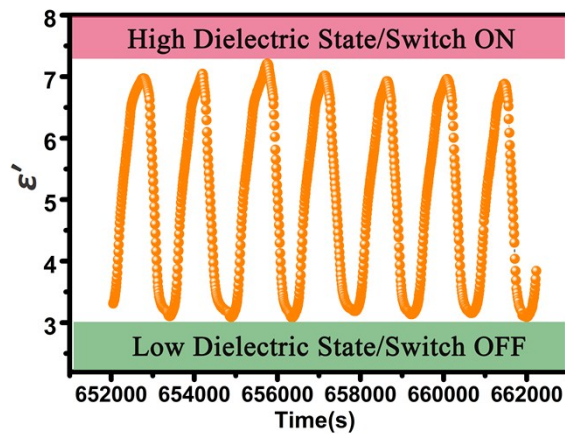

**Fig. S8** Reversible switching effect of dielectric constant on single crystals of  $(\text{IPTMA})_2\text{MnBr}_4$ .

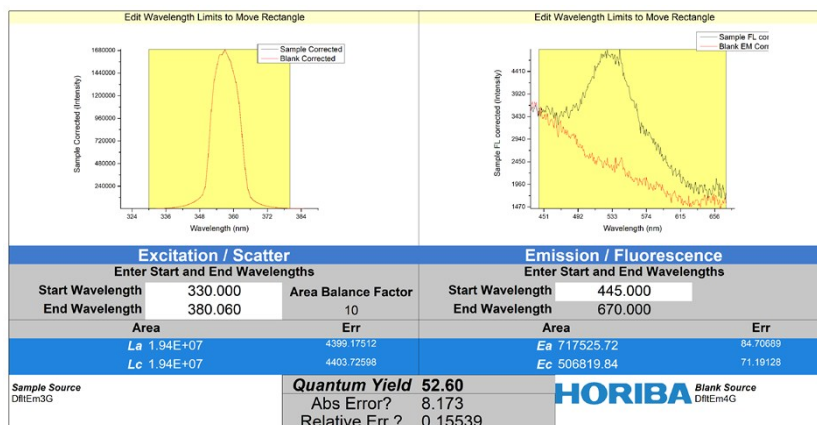

**Fig. S9** The quantum yield measurement results of  $(\text{IPTMA})_2\text{MnBr}_4$ .

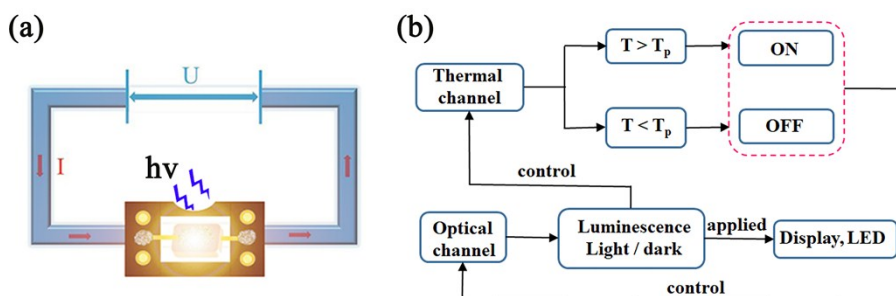

**Fig. S10** (a) Schematic diagram for dielectric measurements on the electrodes made of sample. (b) Logic diagram in optoelectronic smart-controlled device.

**Table S1.** Crystal data and structure refinement for  $(\text{IPTMA})_2\text{CdBr}_4$ .

| Compound          | LTP (143 K)                                         | HTP (253 K)                                         |
|-------------------|-----------------------------------------------------|-----------------------------------------------------|
| Empirical formula | $\text{C}_{12}\text{H}_{32}\text{N}_2\text{CdBr}_4$ | $\text{C}_{12}\text{H}_{32}\text{N}_2\text{CdBr}_4$ |
| Formula weight    | 636.44                                              | 636.44                                              |
| Temperature (K)   | 143                                                 | 253                                                 |
| Crystal system    | Monoclinic                                          | Orthorhombic                                        |
| Space group       | $P2(1)/c$                                           | $Pnma$                                              |
| $a$ (Å)           | 15.9526 (5)                                         | 13.6730 (9)                                         |
| $b$ (Å)           | 13.5636 (3)                                         | 9.7984 (8)                                          |
| $c$ (Å)           | 33.5878 (10)                                        | 16.6817 (10)                                        |
| $\alpha$ (°)      | 90                                                  | 90                                                  |

|                         |             |            |
|-------------------------|-------------|------------|
| $\beta$ (°)             | 116.288 (3) | 90         |
| $\gamma$ (°)            | 90          | 90         |
| Volume(Å <sup>3</sup> ) | 6515.9 (3)  | 2234.9 (3) |
| Z                       | 12          | 4          |
| <i>F</i> (000)          | 3672        | 1096       |
| GOF                     | 1.134       | 1.054      |
| $R_I[I > 2\sigma(I)]$   | 0.0824      | 0.0784     |
| wR2[ $I > 2\sigma(I)$ ] | 0.2056      | 0.2929     |

**Table S2.** Crystal data and structure refinement for (IPTMA)<sub>2</sub>MnBr<sub>4</sub>.

| Compound                | LTP (143 K)                                                      | ITP (193 K)                                                      | HTP (253 K)                                                      |
|-------------------------|------------------------------------------------------------------|------------------------------------------------------------------|------------------------------------------------------------------|
| Empirical formula       | C <sub>12</sub> H <sub>32</sub> N <sub>2</sub> MnBr <sub>4</sub> | C <sub>12</sub> H <sub>32</sub> N <sub>2</sub> MnBr <sub>4</sub> | C <sub>12</sub> H <sub>32</sub> N <sub>2</sub> MnBr <sub>4</sub> |
| Formula weight          | 578.72                                                           | 578.72                                                           | 578.72                                                           |
| Temperature             | 143 K                                                            | 193 K                                                            | 253 K                                                            |
| Crystal system          | Monoclinic                                                       | Monoclinic                                                       | orthorhombic                                                     |
| Space group             | <i>P2(1)/c</i>                                                   | <i>P2(1)/n</i>                                                   | <i>Pnma</i>                                                      |
| <i>a</i> (Å)            | 9.8236 (13)                                                      | 9.8508 (11)                                                      | 13.6445 (16)                                                     |
| <i>b</i> (Å)            | 13.7526 (12)                                                     | 13.7174 (11)                                                     | 9.7917 (15)                                                      |
| <i>c</i> (Å)            | 18.668 (2)                                                       | 16.068 (2)                                                       | 16.534 (2)                                                       |
| $\alpha$ (°)            | 90                                                               | 90                                                               | 90                                                               |
| $\beta$ (°)             | 120.339 (9)                                                      | 91.517 (11)                                                      | 90                                                               |
| $\gamma$ (°)            | 90                                                               | 90                                                               | 90                                                               |
| Volume(Å <sup>3</sup> ) | 2176.7 (4)                                                       | 2170.5 (4)                                                       | 2209.0 (5)                                                       |
| Z                       | 4                                                                | 4                                                                | 4                                                                |
| GOF                     | 1.109                                                            | 1.221                                                            | 1.057                                                            |
| $R_I[I > 2\sigma(I)]$   | 0.161                                                            | 0.1403                                                           | 0.0799                                                           |
| wR2[ $I > 2\sigma(I)$ ] | 0.4864                                                           | 0.4428                                                           | 0.2737                                                           |

**Table S3.** Selected bond lengths [ $\text{\AA}$ ] for  $(\text{IPTMA})_2\text{CdBr}_4$  at LTP.

| Bond lengths and angles [ $\text{\AA}$ ] |             |              |            |
|------------------------------------------|-------------|--------------|------------|
| Cd2—Br7                                  | 2.5907 (10) | Cd3—Br9      | 2.5930 (9) |
| Cd1—Br3                                  | 2.5675 (8)  | Cd1—Br2      | 2.5898 (9) |
| Cd1—Br4                                  | 2.5857 (9)  | Cd2—Br6      | 2.5681 (9) |
| Cd1—Br1                                  | 2.5876 (8)  | Cd2—Br8      | 2.5760 (8) |
| Cd2—Br7                                  | 2.5907 (10) | Cd2—Br5      | 2.5970 (8) |
| Cd3—Br10                                 | 2.5686 (11) | Cd3—Br11     | 2.5875 (8) |
| Cd3—Br12                                 | 2.5757 (10) |              |            |
| Br6—Cd2—Br5                              | 108.61 (3)  | Br11—Cd3—Br9 | 105.71 (3) |
| Br8—Cd2—Br5                              | 110.12 (3)  | Br12—Cd3—Br9 | 111.60 (4) |
| Br7—Cd2—Br5                              | 110.06 (3)  | Br3—Cd1—Br4  | 110.98 (3) |
| Br10—Cd3—Br12                            | 108.37 (3)  | Br3—Cd1—Br1  | 110.17 (3) |
| Br10—Cd3—Br11                            | 111.71 (3)  | Br4—Cd1—Br1  | 107.26 (3) |
| Br12—Cd3—Br11                            | 112.76 (3)  | Br3—Cd1—Br2  | 112.22 (3) |
| Br10—Cd3—Br9                             | 106.52 (4)  | Br4—Cd1—Br2  | 109.47 (3) |
| Br1—Cd1—Br2                              | 106.53 (3)  | Br6—Cd2—Br7  | 111.11 (4) |
| Br6—Cd2—Br8                              | 109.71 (3)  | Br8—Cd2—Br7  | 107.24 (3) |

**Table S4.** Selected bond lengths [ $\text{\AA}$ ] for  $(\text{IPTMA})_2\text{CdBr}_4$  at HTP.

| Bond lengths and angles [ $\text{\AA}$ ] |             |                       |             |
|------------------------------------------|-------------|-----------------------|-------------|
| Cd1—Br3                                  | 2.471 (6)   | Cd1—Br1               | 2.5848 (18) |
| Cd1—Br3 <sup>i</sup>                     | 2.471 (6)   | Cd1—Br3'              | 2.673 (6)   |
| Cd1—Br2                                  | 2.5551 (19) | Cd1—Br3' <sup>i</sup> | 2.673 (6)   |



|                            |             |                                         |             |
|----------------------------|-------------|-----------------------------------------|-------------|
| Br3—Cd1—Br3 <sup>i</sup>   | 95.5 (3)    | Br1—Cd1—Br3'                            | 101.13 (14) |
| Br3—Cd1—Br2                | 110.82 (19) | Br3—Cd1—Br3 <sup>ii</sup>               | 111.75 (18) |
| Br3 <sup>i</sup> —Cd1—Br2  | 110.82 (19) | Br3 <sup>i</sup> —Cd1—Br3 <sup>ii</sup> | 16.58 (16)  |
| Br3—Cd1—Br1                | 111.35 (16) | Br2—Cd1—Br3 <sup>ii</sup>               | 105.95 (17) |
| Br3 <sup>i</sup> —Cd1—Br1  | 111.35 (16) | Br1—Cd1—Br3 <sup>ii</sup>               | 101.13 (14) |
| Br2—Cd1—Br1                | 115.33 (7)  | Br3'—Cd1—Br3 <sup>ii</sup>              | 127.8 (2)   |
| Br3—Cd1—Br3'               | 16.58 (16)  | Br2—Cd1—Br3'                            | 105.95 (17) |
| Br3 <sup>i</sup> —Cd1—Br3' | 111.75 (18) |                                         |             |

**Table S5.** Selected bond lengths [ $\text{\AA}$ ] for  $(\text{IPTMA})_2\text{MnBr}_4$  at LTP.

| Bond lengths and angles [ $\text{\AA}$ ] |             |             |             |
|------------------------------------------|-------------|-------------|-------------|
| Br1—Mn1                                  | 2.498 (4)   | Br3—Mn1     | 2.480 (4)   |
| Br2—Mn1                                  | 2.483 (4)   | Br4—Mn1     | 2.493 (4)   |
| Br3—Mn1—Br2                              | 111.82 (15) | Br3—Mn1—Br1 | 110.50 (15) |
| Br3—Mn1—Br4                              | 109.62 (16) | Br2—Mn1—Br1 | 107.05 (15) |
| Br2—Mn1—Br4                              | 108.8 (2)   | Br4—Mn1—Br1 | 108.99 (15) |

**Table S6.** Selected bond lengths [ $\text{\AA}$ ] for  $(\text{IPTMA})_2\text{MnBr}_4$  at ITP.

| Bond lengths and angles [ $\text{\AA}$ ] |           |                                          |           |
|------------------------------------------|-----------|------------------------------------------|-----------|
| Br1—Mn2                                  | 2.477 (3) | Mn2—Br2A                                 | 2.361 (9) |
| Br3—Mn2                                  | 2.495 (3) | Mn2—Br2B <sup>i</sup>                    | 2.610 (9) |
| Mn2—Br2A <sup>i</sup>                    | 2.361 (9) | Mn2—Br2B                                 | 2.610 (9) |
| Br2A <sup>i</sup> —Mn2—Br2A              | 94.6 (4)  | Br2A <sup>i</sup> —Mn2—Br2B <sup>i</sup> | 16.1 (3)  |
| Br2A <sup>i</sup> —Mn2—Br1               | 111.3 (3) | Br2A—Mn2—Br2B <sup>i</sup>               | 110.4 (2) |
| Br2A—Mn2—Br1                             | 111.3 (3) | Br1—Mn2—Br2B <sup>i</sup>                | 106.5 (3) |

|                             |             |                             |           |
|-----------------------------|-------------|-----------------------------|-----------|
| Br2A <sup>i</sup> —Mn2—Br3  | 111.9 (2)   | Br3—Mn2—Br2B <sup>i</sup>   | 101.9 (2) |
| Br2A—Mn2—Br3                | 111.9 (2)   | Br2A <sup>i</sup> —Mn2—Br2B | 110.4 (2) |
| Br1—Mn2—Br3                 | 114.29 (11) | Br2A—Mn2—Br2B               | 16.1 (3)  |
| Br3—Mn2—Br2B                | 101.9 (2)   | Br1—Mn2—Br2B                | 106.5 (3) |
| Br2B <sup>i</sup> —Mn2—Br2B | 125.9 (4)   |                             |           |

**Table S7.** Selected bond lengths [ $\text{\AA}$ ] for (IPTMA)<sub>2</sub>MnBr<sub>4</sub> at HTP.

| Bond lengths and angles [ $\text{\AA}$ ] |             |               |             |
|------------------------------------------|-------------|---------------|-------------|
| Br2—Mn1                                  | 2.4952 (12) | Mn1—Br1       | 2.4890 (13) |
| Mn1—Br4B                                 | 2.469 (2)   | Mn1—Br4A      | 2.502 (2)   |
| Mn1—Br3                                  | 2.4718 (11) |               |             |
| Br4B—Mn1—Br3                             | 113.61 (6)  | Br1—Mn1—Br2   | 108.53 (5)  |
| Br4B—Mn1—Br1                             | 104.96 (6)  | Br4B—Mn1—Br4A | 9.98 (7)    |
| Br3—Mn1—Br1                              | 109.56 (4)  | Br3—Mn1—Br4A  | 108.28 (7)  |
| Br4B—Mn1—Br2                             | 108.74 (6)  | Br1—Mn1—Br4A  | 114.94 (7)  |
| Br3—Mn1—Br2                              | 111.17 (5)  | Br2—Mn1—Br4A  | 104.30 (6)  |
